# Supplementary material for: Sustainable Agriculture in the Face of Climate Change: Exploring Farmers’ Risk Perception, Low-Carbon Technology Adoption, and Productivity in the Guanzhong Plain of China
Source: MDPI journal article supplement (doi:10.3390/w15122228), 2023-06-13
Supplement: s1 [file s1]

## Supplementary:

**Table S1.** Effect of farmers' risk perception on LCAT adoption: Benchmark return (with control variables).

|                                         | (1)                 | (2)                 | (3)                 | (4)                 | (5)                 | (6)                 | (7)                 | (8)                 |
|-----------------------------------------|---------------------|---------------------|---------------------|---------------------|---------------------|---------------------|---------------------|---------------------|
|                                         | OLS                 | OP                  | OLS                 | OP                  | OLS                 | OP                  | OLS                 | OP                  |
| General risk perception                 | 0.137***<br>(0.039) | 0.159***<br>(0.045) |                     |                     |                     |                     |                     |                     |
| Yield risk perception                   |                     |                     | 0.313**<br>(0.150)  | 0.371**<br>(0.171)  |                     |                     |                     |                     |
| Market risk perception                  |                     |                     |                     |                     | 0.392***<br>(0.092) | 0.456***<br>(0.107) |                     |                     |
| Climate risk perception                 |                     |                     |                     |                     |                     |                     | 0.325***<br>(0.095) | 0.372***<br>(0.108) |
| Age                                     | -0.004<br>(0.004)   | -0.004<br>(0.005)   | -0.002<br>(0.004)   | -0.002<br>(0.005)   | -0.002<br>(0.004)   | -0.002<br>(0.005)   | -0.003<br>(0.005)   | -0.003<br>(0.005)   |
| Gender                                  | 0.078<br>(0.166)    | 0.084<br>(0.188)    | 0.047<br>(0.167)    | 0.047<br>(0.187)    | 0.054<br>(0.166)    | 0.056<br>(0.188)    | 0.050<br>(0.164)    | 0.052<br>(0.185)    |
| Education level                         | 0.062<br>(0.052)    | 0.068<br>(0.058)    | 0.072<br>(0.052)    | 0.079<br>(0.058)    | 0.047<br>(0.052)    | 0.050<br>(0.059)    | 0.072<br>(0.052)    | 0.080<br>(0.058)    |
| Income                                  | -0.056<br>(0.072)   | -0.070<br>(0.083)   | -0.049<br>(0.073)   | -0.061<br>(0.083)   | -0.045<br>(0.074)   | -0.057<br>(0.085)   | -0.046<br>(0.073)   | -0.058<br>(0.084)   |
| Agricultural labor                      | 0.101<br>(0.069)    | 0.122<br>(0.078)    | 0.113<br>(0.071)    | 0.134*<br>(0.079)   | 0.078<br>(0.070)    | 0.096<br>(0.079)    | 0.113<br>(0.070)    | 0.135*<br>(0.079)   |
| Non-farm income                         | 0.320<br>(0.300)    | 0.379<br>(0.349)    | 0.325<br>(0.296)    | 0.381<br>(0.341)    | 0.294<br>(0.308)    | 0.348<br>(0.359)    | 0.319<br>(0.298)    | 0.377<br>(0.345)    |
| Distance from township government       | -0.029<br>(0.023)   | -0.032<br>(0.026)   | -0.037<br>(0.024)   | -0.042<br>(0.027)   | -0.023<br>(0.023)   | -0.026<br>(0.026)   | -0.025<br>(0.022)   | -0.028<br>(0.025)   |
| Land                                    | 0.013<br>(0.011)    | 0.016<br>(0.016)    | 0.014<br>(0.011)    | 0.017<br>(0.016)    | 0.012<br>(0.011)    | 0.016<br>(0.016)    | 0.013<br>(0.011)    | 0.016<br>(0.016)    |
| Degree of cultivated land fragmentation | -0.061<br>(0.043)   | -0.073<br>(0.049)   | -0.070*<br>(0.043)  | -0.083*<br>(0.049)  | -0.062<br>(0.042)   | -0.075<br>(0.049)   | -0.067<br>(0.043)   | -0.080<br>(0.050)   |
| Land titling                            | 0.320***<br>(0.115) | 0.376***<br>(0.133) | 0.310***<br>(0.118) | 0.358***<br>(0.135) | 0.361***<br>(0.116) | 0.424***<br>(0.136) | 0.316***<br>(0.117) | 0.369***<br>(0.134) |
| Social network                          | -0.101<br>(0.129)   | -0.114<br>(0.146)   | -0.138<br>(0.130)   | -0.158<br>(0.145)   | -0.093<br>(0.129)   | -0.105<br>(0.145)   | -0.120<br>(0.129)   | -0.137<br>(0.145)   |
| Training                                | -0.036<br>(0.239)   | -0.036<br>(0.272)   | -0.018<br>(0.247)   | -0.015<br>(0.278)   | 0.045<br>(0.239)    | 0.059<br>(0.274)    | -0.064<br>(0.251)   | -0.068<br>(0.285)   |
| E-learning                              | 0.228**<br>(0.090)  | 0.255**<br>(0.102)  | 0.261***<br>(0.090) | 0.289***<br>(0.102) | 0.204**<br>(0.091)  | 0.227**<br>(0.104)  | 0.242***<br>(0.090) | 0.270***<br>(0.102) |
| Intergenerational transmission          | 0.151               | 0.163               | 0.127               | 0.133               | 0.116               | 0.123               | 0.149               | 0.161               |

|                                |          |          |          |          |          |          |          |          |
|--------------------------------|----------|----------|----------|----------|----------|----------|----------|----------|
|                                | (0.185)  | (0.206)  | (0.188)  | (0.207)  | (0.191)  | (0.213)  | (0.185)  | (0.205)  |
| Agricultural surface pollution | 0.103**  | 0.121**  | 0.086**  | 0.101**  | 0.097**  | 0.115**  | 0.092**  | 0.107**  |
|                                | (0.043)  | (0.049)  | (0.043)  | (0.049)  | (0.042)  | (0.048)  | (0.042)  | (0.048)  |
| Experiencing shock             | -0.121   | -0.140   | -0.144   | -0.165   | -0.105   | -0.122   | -0.159*  | -0.183*  |
|                                | (0.093)  | (0.105)  | (0.094)  | (0.106)  | (0.092)  | (0.105)  | (0.093)  | (0.105)  |
| Agricultural insurance         | 0.048    | 0.054    | 0.062    | 0.068    | 0.040    | 0.043    | 0.045    | 0.049    |
|                                | (0.159)  | (0.180)  | (0.162)  | (0.181)  | (0.161)  | (0.182)  | (0.162)  | (0.182)  |
| Government subsidies           | -0.198   | -0.263   | -0.200   | -0.263   | -0.215   | -0.284   | -0.204   | -0.266   |
|                                | (0.291)  | (0.339)  | (0.297)  | (0.340)  | (0.293)  | (0.341)  | (0.299)  | (0.345)  |
| Demonstration area             | -0.035   | -0.051   | -0.042   | -0.058   | -0.061   | -0.082   | 0.018    | 0.014    |
|                                | (0.261)  | (0.295)  | (0.265)  | (0.297)  | (0.258)  | (0.292)  | (0.265)  | (0.300)  |
| Major food-producing counties  | 0.476*** | 0.544*** | 0.449*** | 0.509*** | 0.479*** | 0.550*** | 0.449*** | 0.512*** |
|                                | (0.090)  | (0.100)  | (0.090)  | (0.099)  | (0.091)  | (0.102)  | (0.090)  | (0.100)  |
| _cons                          | 1.930*** |          | 2.065*** |          | 2.071*** |          | 2.076*** |          |
|                                | (0.673)  |          | (0.675)  |          | (0.675)  |          | (0.668)  |          |
| R2                             | 0.1401   |          | 0.1239   |          | 0.1468   |          | 0.1340   |          |
| Pseudo R2                      |          | 0.0537   |          | 0.0472   |          | 0.0566   |          | 0.0511   |
| N                              | 531      | 531      | 531      | 531      | 531      | 531      | 531      | 531      |
